# Supplementary material for: Low-carbon footprint diluents in solvent extraction for lithium-ion battery recycling
Source: Royal Society of Chemistry journal article supplement (doi:10.1039/d3ra04679f), 2023-01-01
Supplement: d3ra04679f1.pdf [file d3ra04679f1.pdf]

## Low-carbon footprint diluents in solvent extraction for lithium-ion battery recycling

Aboudaye M. Ahamed<sup>a</sup>, Benjamin Swoboda<sup>b</sup>, Zubin Arora<sup>b</sup>, Jean Yves Lansot<sup>b</sup> and Alexandre Chagnes<sup>a</sup>

### Supporting Information

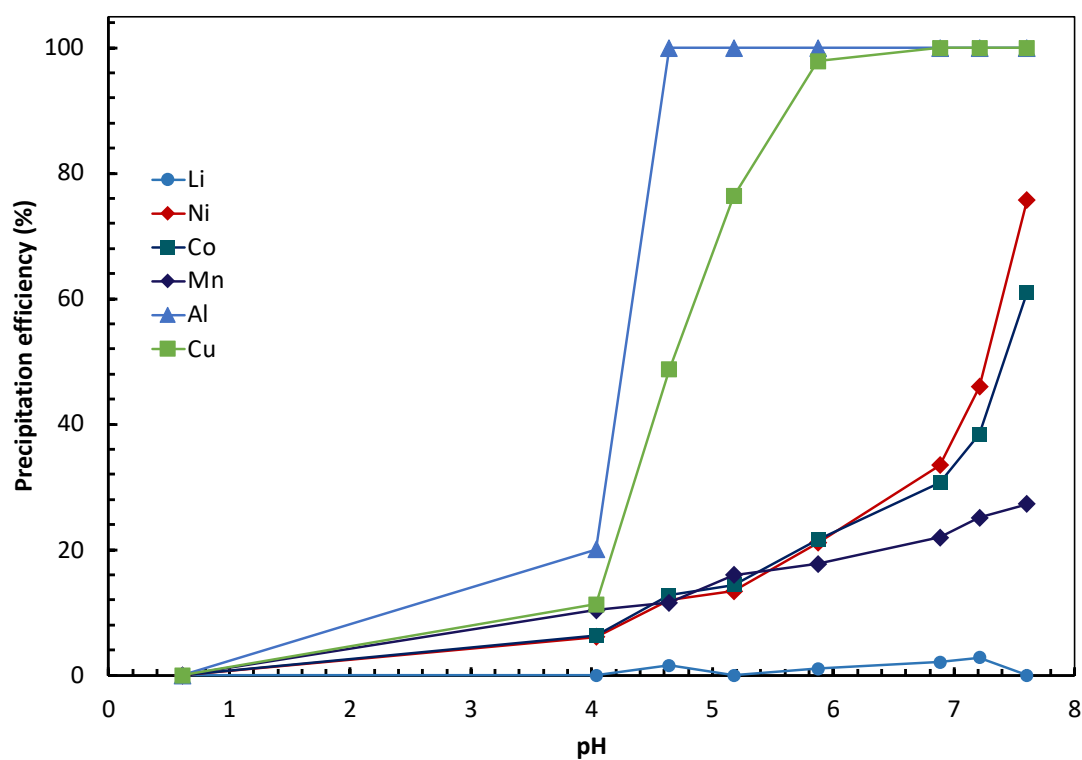

Figure S1: Precipitation curves as a function of pH.

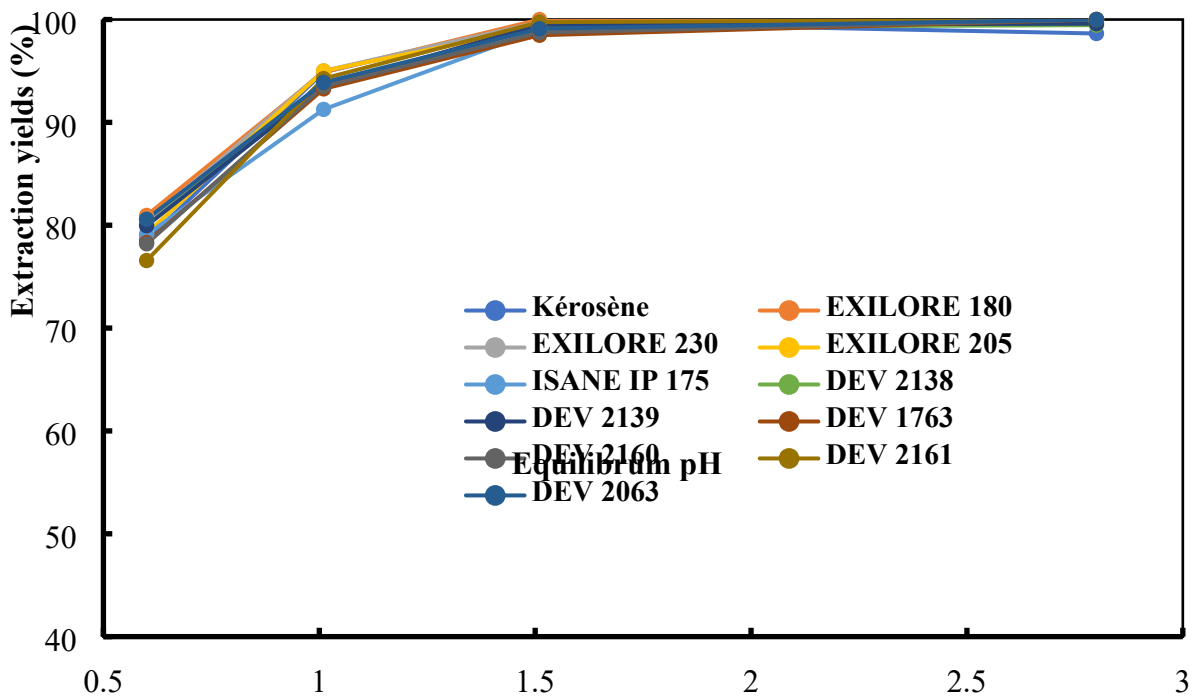

Figure S2: Extraction of copper by using Accorga M5640.
